# Supplementary material for: The impact of measurement errors in the identification of regulatory networks
Source: Springer Nature journal article supplement (doi:10.1186/1471-2105-10-412), 2009-12-01

**A**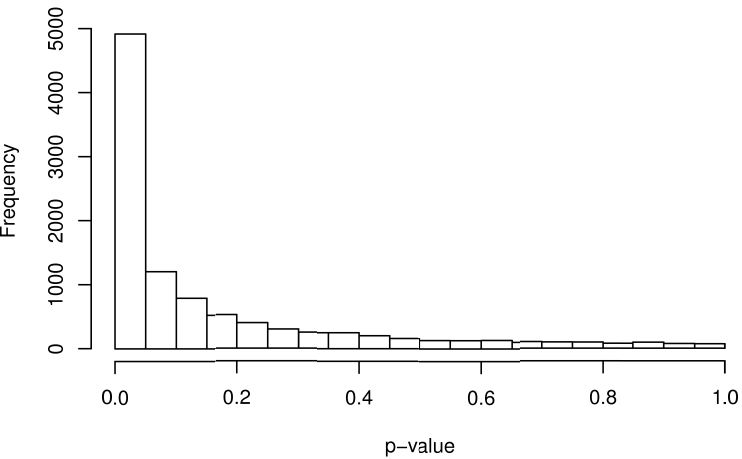**B**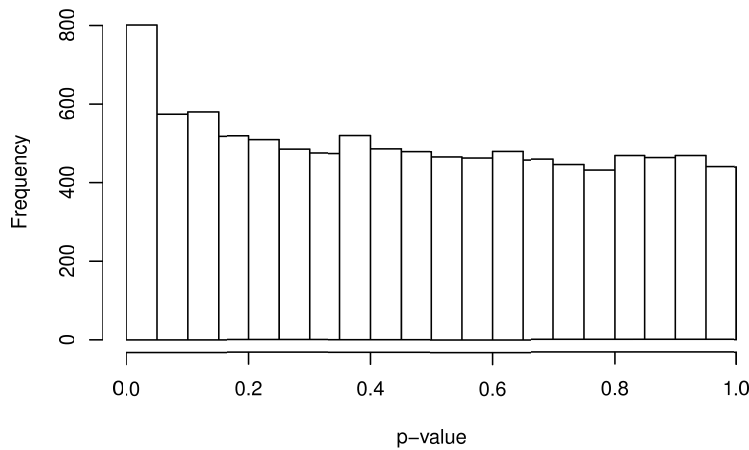**C**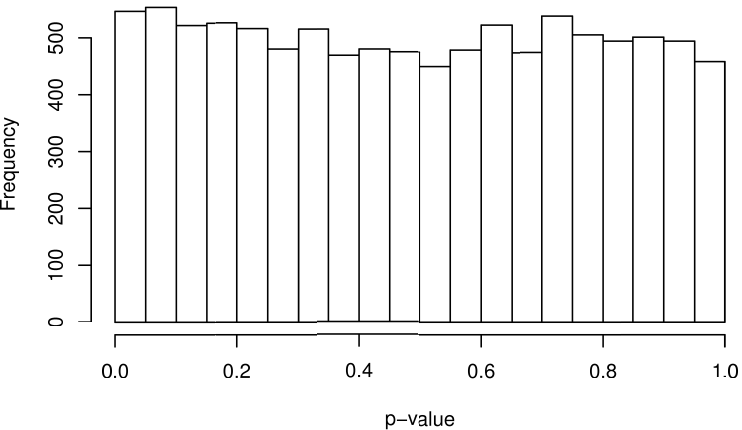**D**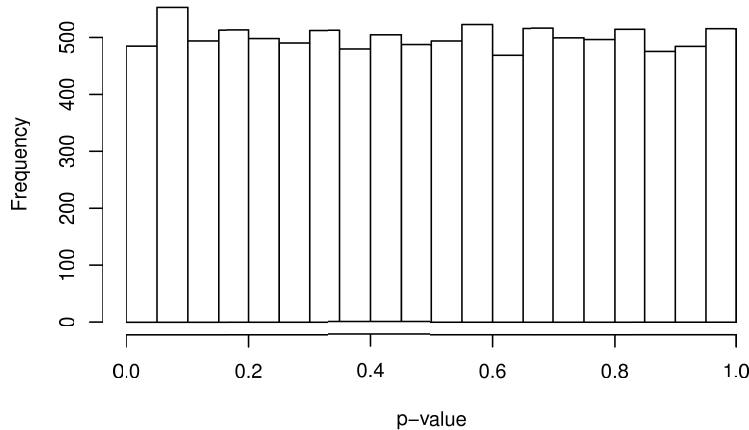

Supplement: 12859_2009_3142_MOESM2_ESM.pdf [file 12859_2009_3142_MOESM2_ESM.pdf]
